# Supplementary material
Source: PubMed Central journal article supplement (PMC9524404)
Supplement: NIHMS1795888-supplement-Supplemental_Data_File___doc___tif__pdf__etc___1.pdf [file NIHMS1795888-supplement-Supplemental_Data_File___doc___tif__pdf__etc___1.pdf]

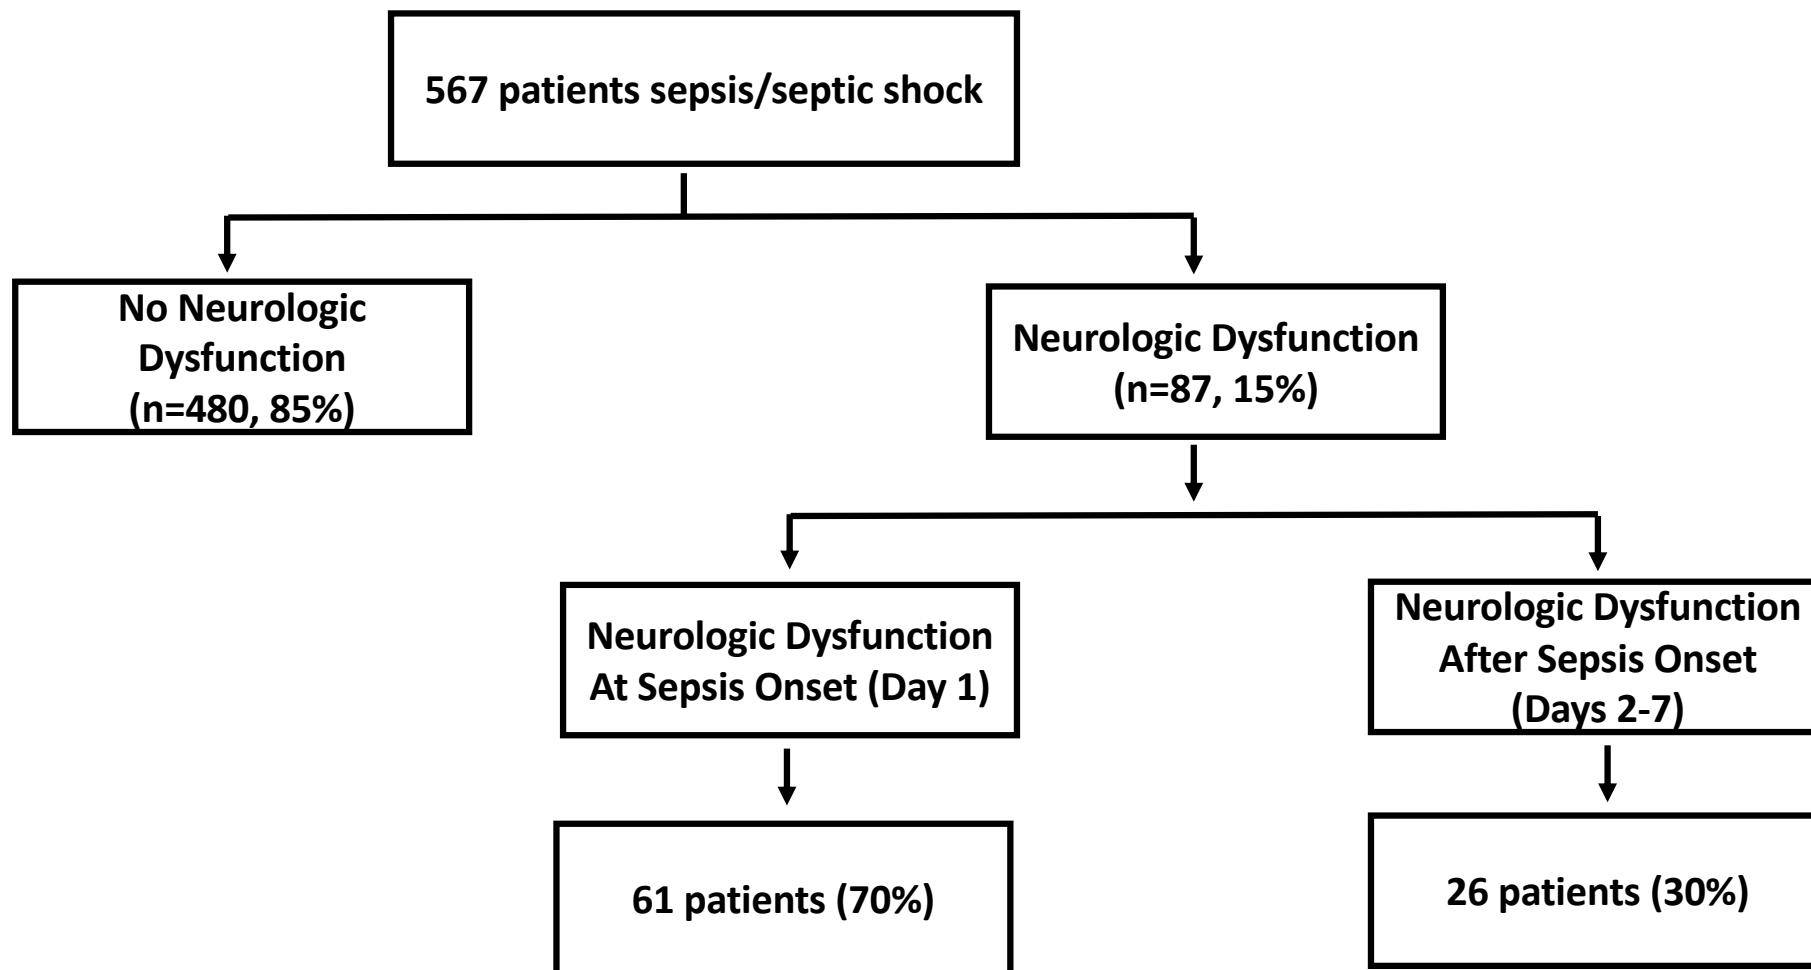

**eFigure 1. Flowchart of patient stratification by the presence or absence of neurologic dysfunction during sepsis. Further dichotomization is shown based on timing of neurologic dysfunction recognition.**
